# Supplementary material for: Phenology and Robustness in plant-pollinator networks
Source: bioRxiv or medRxiv preprint supplement (doi:10.1101/2020.10.30.362616), 2020-11-01
Supplement: Supplementary file [file media-1.pdf]

Appendix A. Details for each of the study sites.

Table A1. Details of each of the study sites in British Columbia, Canada. Abbreviations: oak sav. = oak savannah; antel. steppe = antelope shrub steppe; sage. steppe = sagebrush steppe.

| Site name (abbrev.) | Year(s) Coll. | Ecosystem     | Latitude | Longitude |
|---------------------|---------------|---------------|----------|-----------|
| go1, go2            | 09/10         | oak sav.      | 48.808   | -123.631  |
| mz1, mz2            | 09/10         | oak sav.      | 48.791   | -123.638  |
| fs1, fs2            | 09/10         | oak sav.      | 48.819   | -124.134  |
| mm1, mm2            | 09/10         | oak sav.      | 48.818   | -124.117  |
| sm1, sm2            | 09/10         | oak sav.      | 48.782   | -123.885  |
| cr1, cr2            | 09/10         | oak sav.      | 48.777   | -123.941  |
| HLU                 | 10            | antel. steppe | 49.087   | -119.518  |
| HLG                 | 10            | antel. steppe | 49.091   | -119.527  |
| OKU                 | 10            | antel. steppe | 49.262   | -119.509  |
| OKG                 | 10            | antel. steppe | 49.184   | -119.586  |
| WLU                 | 10            | sage. steppe  | 49.303   | -119.630  |
| WLG                 | 10            | sage. steppe  | 49.312   | -119.680  |
| SOU                 | 10            | sage. steppe  | 49.015   | -119.588  |
| SOG                 | 10            | sage. steppe  | 49.011   | -119.621  |
| AG                  | 13            | urban forest  | 49.010   | -122.451  |
| BB-2                | 13            | urban forest  | 49.017   | -123.052  |
| BI                  | 13            | urban forest  | 49.175   | -122.580  |
| CV                  | 13            | urban forest  | 49.018   | -122.664  |
| BB-1                | 13            | urban forest  | 49.016   | -123.041  |
| CF-1                | 13            | urban forest  | 49.241   | -122.809  |
| CF-2                | 13            | urban forest  | 49.240   | -122.796  |
| DP                  | 13            | urban forest  | 49.079   | -122.938  |
| LSCR                | 13            | urban forest  | 49.395   | -122.992  |
| OM                  | 13            | urban forest  | 49.238   | -123.126  |
| PS-2                | 13            | urban forest  | 49.254   | -123.196  |
| PS-1                | 13            | urban forest  | 49.271   | -123.259  |

---

| Site name (abbrev.) | Year(s) Coll. | Ecosystem    | Latitude | Longitude |
|---------------------|---------------|--------------|----------|-----------|
| TH                  | 13            | urban forest | 49.184   | -122.750  |

---
