# Supplementary material for: Phenology and Robustness in plant-pollinator networks
Source: bioRxiv or medRxiv preprint supplement (doi:10.1101/2020.10.30.362616), 2020-11-01
Supplement: Supplementary file [file media-2.pdf]

## Supplementary material

**Table S1**

Model structure was: response ~ log10(first\_julian) + log10(days) + (1 | pi/.id) + Family random effect.

### *Plants*

| Model | Family random effect                   | z  |                | c  |                | d' |                 | ia |                 |
|-------|----------------------------------------|----|----------------|----|----------------|----|-----------------|----|-----------------|
|       |                                        | df | AIC            | df | AIC            | df | AIC             | df | AIC             |
| 1     | (1   FamilyName)                       | 7  | 1848.62        | 6  | 606.699        | 6  | 750.7722        | 7  | 517.8107        |
|       |                                        | 8  |                |    |                |    |                 |    |                 |
| 2     | (0 + log10(days)   FamilyName)         | 7  | 1848.56        | 6  | <b>606.699</b> | 6  | <b>748.7950</b> | 7  | 530.1231        |
|       |                                        | 6  |                |    |                |    |                 |    |                 |
| 3     | (0 + log10(first_julian)   FamilyName) | 7  | 1849.44        | 6  | 606.699        | 6  | 751.2407        | 7  | 517.7547        |
|       |                                        | 1  |                |    |                |    |                 |    |                 |
| 4     | (1 + log10(days)   FamilyName)         | 9  | 1847.37        | 8  | 610.699        | 8  | 752.1878        | 9  | <b>505.4113</b> |
|       |                                        | 8  |                |    |                |    |                 |    |                 |
| 5     | (1 + log10(first_julian)   FamilyName) | 9  | <b>1845.08</b> | 8  | 610.699        | 8  | 755.2375        | 9  | 520.9011        |
|       |                                        | 8  |                |    |                |    |                 |    |                 |

### *Pollinators*

| Model | Family random effect                   | z  |                | c  |                 | d' |                 | ia |                 |
|-------|----------------------------------------|----|----------------|----|-----------------|----|-----------------|----|-----------------|
|       |                                        | df | AIC            | df | AIC             | df | AIC             | df | AIC             |
| 1     | (1   FamilyName)                       | 7  | 2027.59        | 6  | 1099.950        | 6  | 1332.472        | 7  | 1105.336        |
|       |                                        | 6  |                |    |                 |    |                 |    |                 |
| 2     | (0 + log10(days)   FamilyName)         | 7  | <b>1996.51</b> | 6  | 1099.950        | 6  | <b>1332.472</b> | 7  | <b>1072.677</b> |
|       |                                        | 0  |                |    |                 |    |                 |    |                 |
| 3     | (0 + log10(first_julian)   FamilyName) | 7  | 2030.21        | 6  | 1099.950        | 6  | 1332.472        | 7  | 1108.556        |
|       |                                        | 3  |                |    |                 |    |                 |    |                 |
| 4     | (1 + log10(days)   FamilyName)         | 9  | 1998.20        | 8  | <b>1089.255</b> | 8  | 1336.472        | 9  | 1076.677        |
|       |                                        | 8  |                |    |                 |    |                 |    |                 |
| 5     | (1 + log10(first_julian)   FamilyName) | 9  | 2017.61        | 8  | 1103.950        | 8  | 1336.472        | 9  | 1090.839        |
|       |                                        | 7  |                |    |                 |    |                 |    |                 |
